# Supplementary material for: Wu-tou decoction attenuates neuropathic pain via suppressing spinal astrocytic IL-1R1/TRAF6/JNK signaling
Source: PubMed Central journal article supplement (PMC5696228; doi:10.18632/oncotarget.21638), 2017-10-06
Supplement: oncotarget-08-92864-s001.pdf [file oncotarget-08-92864-s001.pdf]

# Wu-tou decoction attenuates neuropathic pain via suppressing spinal astrocytic IL-1R1/TRAF6/JNK signaling

## SUPPLEMENTARY MATERIALS

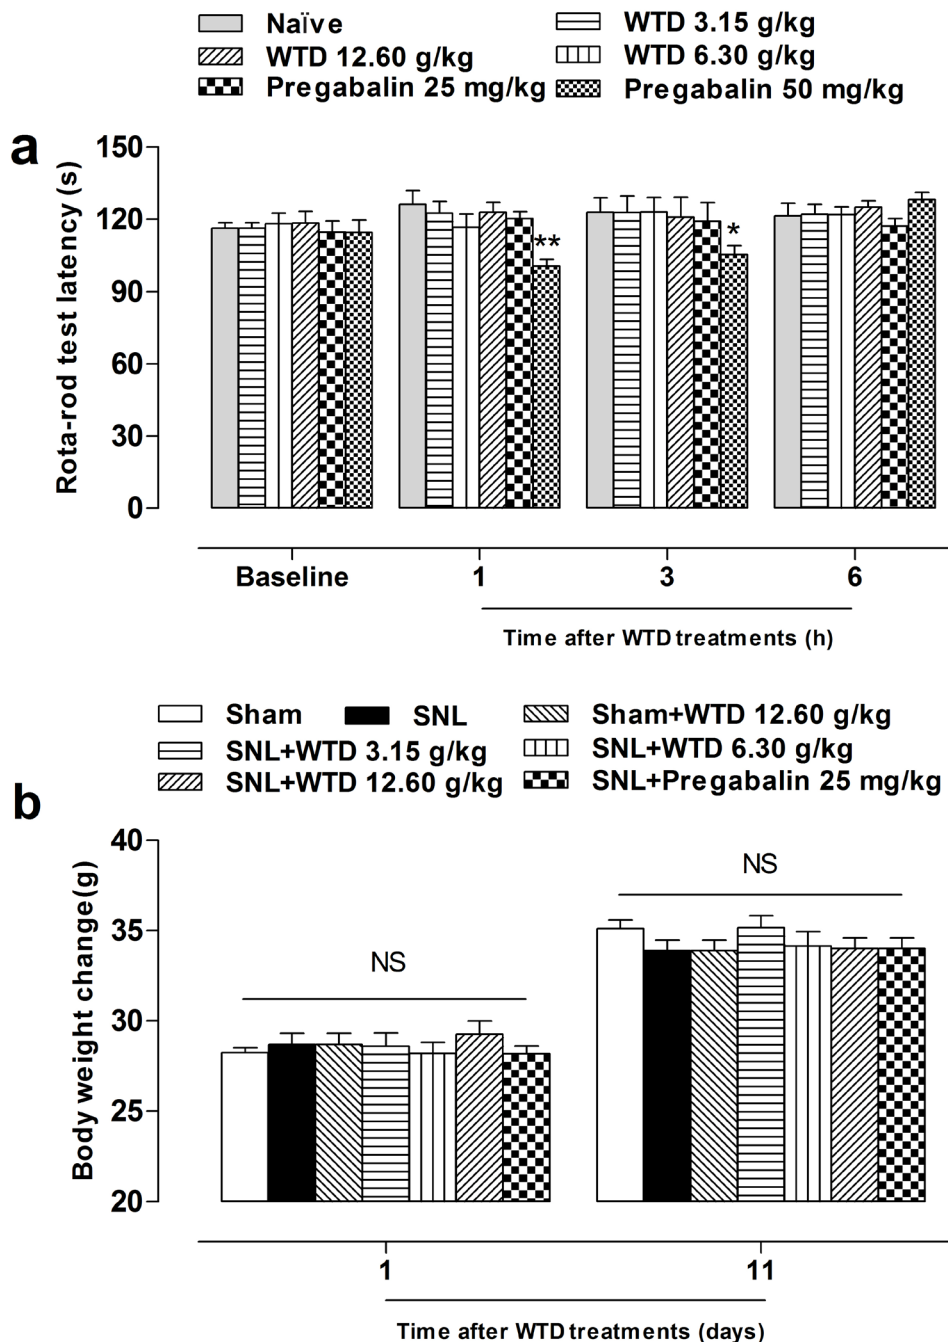

**Supplementary Figure 1: Side effects assessments of WTD.** WTD (3.15-12.60 g/kg, p.o) and pregabalin (25 mg/kg, p.o.) did not impair the locomotor function of naïve mice in the Rota-rod test 1-6 hours after drug administration, while pregabalin (50 mg/kg, p.o.) significantly reduced the latency time of mice 1 and 3 hours post drug treatment (a). WTD did not induce noticeable body weight loss in each group 7 days after drug administration. Data are represented as mean ± SEM. (n=6). \* $P < 0.05$ , \*\* $P < 0.01$  in Supplementary Figure 1a vs. naïve mice.

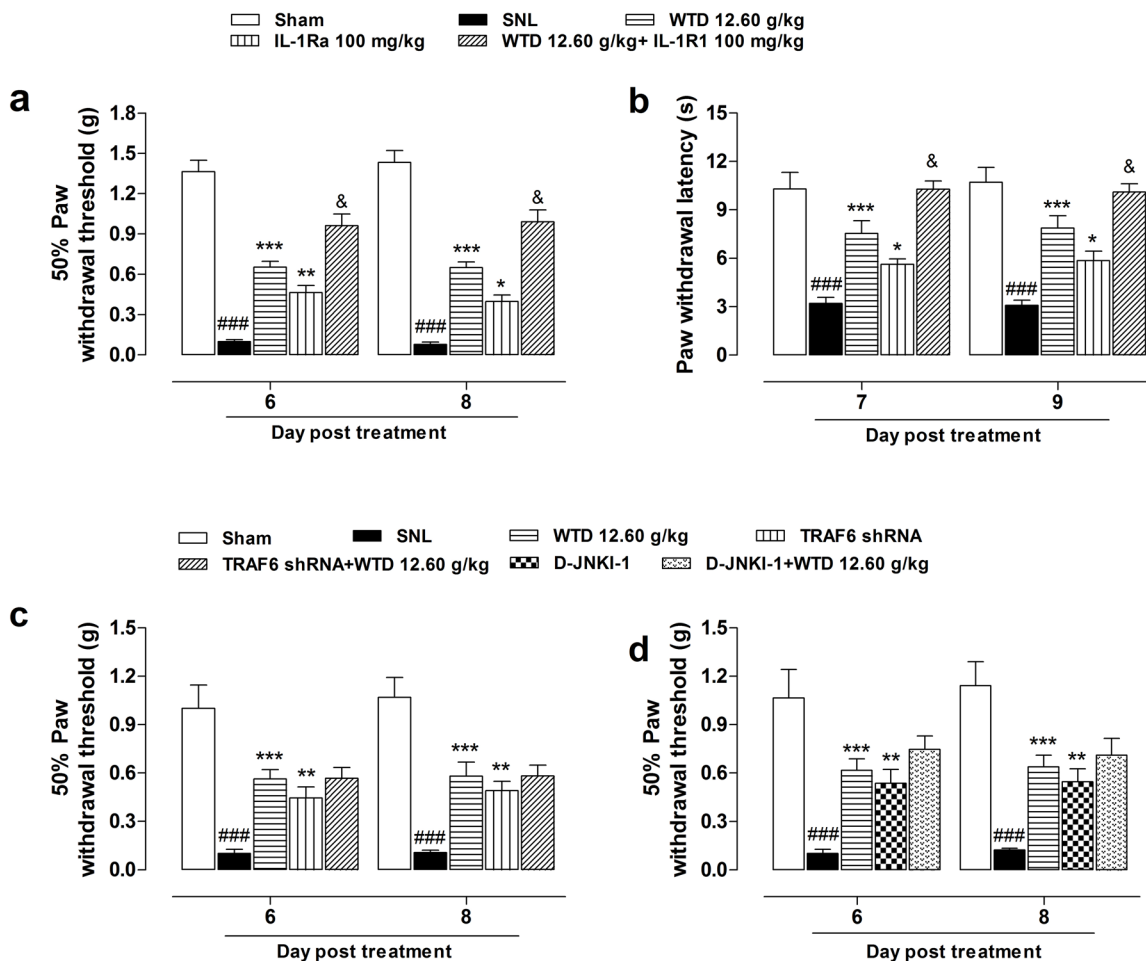

**Supplementary Figure 2: Anti-hyperalgesia effects of WTD co-administrated with inhibitors of IL-1R1, TRAF6 or JNK.** Pretreatment of IL-Ra (100 mg/kg, i.p., 2 hours before), an specific inhibitor of IL-1R1, with WTD (12.60 g/kg, p.o., 1 hour before) significantly attenuated SNL induced mechanical allodynia, heat hyperalgesia, and increased WTD analgesic effect 5-9 days post drug administration (**a**, **b**). Otherwise, neither co-administration of LV-TRAF6-shRNA (4  $\mu$ l, intraspinal injection, 3 days prior to test), the specific inhibitor of TRAF6, nor D-JNKI-1 (0.3 mg/kg, i.p., 30 minutes before), the specific inhibitor of JNK with WTD (12.60 g/kg, p.o., 1 hour before) increased WTD's anti-allodynia effect on 6th and 8th day post drug administration (**c**, **d**). Data are represented as the mean  $\pm$  SEM. (n=6). ### $P$ <0.001 vs. Sham group, \* $P$ <0.05, \*\* $P$ <0.01 and \*\*\* $P$ <0.001 vs. SNL group. & $P$ <0.01 in Supplementary Figure 2a-2b vs. WTD (12.60 g/kg) group.
